# Supplementary material
Source: publisher figshare collection journal article supplement (https://karger.figshare.com/ndownloader/files/13816073)
Supplement: Supplementary file 1 [file 13816073]

**Supplementary Table 1**: classification of psychotropic drugs according to their cardiovascular risk.

| **High risk** | **Medium risk** | **Low risk** | **No effect** |
| --- | --- | --- | --- |
| Haloperidol | Amisulpiride | Olanzapine | Aripiprazole |
| Pimozide | Chlorpromazine | Asenapine | Paliperidone |
| Sertindole | Iloperidone | Clozapine | SSRIs (with exceptions) |
| Any i.v. AP drug | Quetiapine | Fluphenazine | Reboxetine |
| Any dose exceeding the recommendations | Ziprasidone | Perphenazine | Mirtazapine |
|  | TCAs | Risperidone | MAOIs |
|  | Citalopram | Sulpiride | Carbamazepine |
|  | Escitalopram | Bupropion | Gabapentin |
|  |  | Venlafaxine | Lamotrigine |
|  |  | Trazodone | Valproate |
|  |  | Litium | Benzodiazepines |
